# Supplementary material for: Rhinoviruses and Respiratory Enteroviruses: Not as Simple as ABC
Source: PubMed Central journal article supplement (PMC4728576; doi:10.3390/v8010016), 2016-01-11
Supplement: viruses-08-00016-s001.pdf [file viruses-08-00016-s001.pdf]

## Supplementary Material

**Table S1.** Genbank IDs of selected representatives of RV-A to -C, EV-A to -D and Simian Sapelovirus species that were included in the phylogenetic analysis in Figure 2.

| Non-Rhinovirus Enterovirus Species |            |       |            |         |            |         |            |      |            |
|------------------------------------|------------|-------|------------|---------|------------|---------|------------|------|------------|
| EV-A                               |            | EV-B  |            |         |            | EV-C    |            | EV-D |            |
| Type                               | Genbank ID | Type  | Genbank ID | Type    | Genbank ID | Type    | Genbank ID | Type | Genbank ID |
| CV-A2                              | AY421760   | CV-A9 | D00627     | E-17    | AY302543   | PV-1    | V01148     | D68  | AY426531   |
| CV-A8                              | AY421766   | CV-B1 | M16560     | E-18    | AF317694   | PV-3    | KJ170670   | D70  | DQ201177   |
| CV-A10                             | AY421767   | CV-B2 | AF081485   | E-19    | AY302544   | CV-A17  | AF499639   | D94  | DQ916376   |
| CV-A12                             | AY421768   | CV-B3 | M88483     | E-20    | AY302546   | CV-A19  | AF499641   | D111 | JF416935   |
| CV-A14                             | AY421769   | CV-B4 | S76772     | E-21    | AY302547   | CV-A22  | AF499643   | D120 | KF040080   |
| CV-A16                             | AF177911   | CV-B5 | AF114383   | E-25    | AY302549   | CV-A24  | D90457     | –    | –          |
| EV-A71                             | U22522     | CV-B6 | KT380953   | E-27    | AY302551   | EV-C96  | EF015886   | –    | –          |
| EV-A89                             | AY697459   | E-1   | AF029859   | E-29    | AY302552   | EV-C99  | EF555644   | –    | –          |
| EV-A91                             | AY697461   | E-2   | AY302545   | E-30    | AF162711   | EV-C102 | EF555645   | –    | –          |
| EV-A92                             | EF667344   | E-3   | AY302553   | EV-B69  | AY302560   | EV-C104 | EU840733   | –    | –          |
| EV-A119                            | KC787153   | E-4   | AY302557   | EV-B74  | AY556057   | EV-C105 | JF838290   | –    | –          |
| –                                  | –          | E-5   | AF083069   | EV-B75  | AY556070   | EV-C109 | GQ865517   | –    | –          |
| –                                  | –          | E-6   | AY302558   | EV-B78  | AY208120   | EV-C113 | KC344833   | –    | –          |
| –                                  | –          | E-7   | AY302559   | EV-B83  | AY843301   | EV-C116 | JX514942   | –    | –          |
| –                                  | –          | E-9   | AF524866   | EV-B87  | AY843305   | EV-C117 | JX262382   | –    | –          |
| –                                  | –          | E-11  | X80059     | EV-B98  | AB426608   | EV-C118 | JX393301   | –    | –          |
| –                                  | –          | E-12  | X79047     | EV-B100 | DQ902713   | –       | –          | –    | –          |
| –                                  | –          | E-13  | AY302539   | EV-B101 | AY843308   | –       | –          | –    | –          |
| –                                  | –          | E-14  | AY302540   | EV-B106 | KF990476   | –       | –          | –    | –          |
| –                                  | –          | E-15  | AY302541   | EV-B107 | AB426609   | –       | –          | –    | –          |
| –                                  | –          | E-16  | AY302542   | EV-B111 | KF312882   | –       | –          | –    | –          |

Table 1. Cont.

| Rhinovirus Species |            |      |            |         |            |      |            |      |            |
|--------------------|------------|------|------------|---------|------------|------|------------|------|------------|
| RV-A               |            | RV-B |            |         |            | RV-C |            |      |            |
| Type               | Genbank ID | Type | Genbank ID | Type    | Genbank ID | Type | Genbank ID | Type | Genbank ID |
| A1                 | FJ445111   | A55  | DQ473511   | RV-B6   | DQ473486   | C1   | EF077279   | C45  | JN837686   |
| A2                 | X02316     | A57  | FJ445141   | RV-B14  | L05355     | C3   | JN798567   | C47  | JF519760   |
| A7                 | FJ445176   | A58  | FJ445142   | RV-B17  | EF173420   | C4   | EF582385   | C48  | JF519762   |
| A8                 | FJ445113   | A59  | DQ473500   | RV-B42  | FJ445130   | C5   | EF582386   | C51  | JX291115   |
| A9                 | FJ445177   | A60  | FJ445143   | RV-B48  | DQ473488   | C6   | JN815245   | C55  | 529T       |
| A10                | DQ473498   | A61  | FJ445144   | RV-B52  | FJ445188   | C7   | DQ875932   | –    | –          |
| A12                | EF173415   | A63  | FJ445146   | RV-B70  | DQ473489   | C8   | GQ223227   | –    | –          |
| A15                | DQ473493   | A64  | FJ445181   | RV-B79  | FJ445155   | C11  | EU840952   | –    | –          |
| A16                | L24917     | A65  | FJ445147   | RV-B86  | FJ445164   | C12  | HM236958   | –    | –          |
| A19                | FJ445119   | A66  | FJ445148   | RV-B92  | FJ445169   | C13  | HM236908   | –    | –          |
| A21                | FJ445121   | A67  | FJ445149   | RV-B93  | EF173425   | C14  | HM236911   | –    | –          |
| A22                | FJ445122   | A71  | FJ445152   | RV-B97  | FJ445172   | C15  | GU219984   | –    | –          |
| A24                | FJ445190   | A73  | DQ473492   | RV-B99  | FJ445174   | C24  | HM236939   | –    | –          |
| A25                | FJ445123   | A74  | DQ473494   | RV-B100 | HQ123444   | C25  | JN837685   | –    | –          |
| A29                | FJ445125   | A76  | FJ445182   | RV-B101 | JF781500   | C26  | HM236904   | –    | –          |
| A31                | FJ445126   | A78  | FJ445183   | RV-B102 | JX074053   | C27  | HM236906   | –    | –          |
| A32                | FJ445127   | A81  | FJ445157   | RV-B103 | JQ994497   | C28  | JN798569   | –    | –          |
| A34                | FJ445189   | A82  | FJ445160   | RV-B104 | FJ445137   | C29  | HM236949   | –    | –          |
| A36                | DQ473505   | A89  | FJ445184   | –       | –          | C30  | HM236968   | –    | –          |
| A38                | FJ445180   | A100 | FJ445175   | –       | –          | C31  | HM236964   | –    | –          |
| A39                | AY751783   | A101 | GQ415051   | –       | –          | C36  | JN541267   | –    | –          |
| A40                | FJ445129   | A102 | EF155421   | –       | –          | C37  | JF416321   | –    | –          |
| A41                | DQ473491   | A103 | JF965515   | –       | –          | C39  | JN205461   | –    | –          |
| A46                | DQ473506   | A104 | JX193797   | –       | –          | C42  | JQ994500   | –    | –          |
| A49                | DQ473496   | A105 | JN614995   | –       | –          | C43  | JF416307   | –    | –          |
| A53                | DQ473507   | A106 | JX025555   | –       | –          | C44  | JF416310   | –    | –          |

  

| Sapelovirus Species |            |
|---------------------|------------|
| SSV-B               |            |
| Type                | Genbank ID |
| SSV1                | AY064708   |

**Table S2.** References citing unusual symptoms or detection sites of respiratory EVs as listed in Figure 2.

| Clinical features associated with EVs or RVs                                                                                                                                            | References |
|-----------------------------------------------------------------------------------------------------------------------------------------------------------------------------------------|------------|
| <b>RV-A Detected in Stool Samples</b>                                                                                                                                                   |            |
| A1, A7, A9, A10, A12, A19, A21, A22, A24, A31, A32, A34,<br>A36, A38, A40, A41, A46, A49, A53, A55, A54, A57, A58, A59,<br>A60, A61, A63, A66, A67, A71, A73, A78, A81, A89, A101, A103 | [1,2]      |
| <b>RV-A Isolated in Culture from Stool Sample</b>                                                                                                                                       |            |
| A89                                                                                                                                                                                     | [2]        |
| <b>RV-A Detected and Isolated in Culture from Blood Samples</b>                                                                                                                         |            |
| A15, A22                                                                                                                                                                                | [3]        |
| <b>RV-B Detected in Stool Samples</b>                                                                                                                                                   |            |
| B6, B14, B17, B42, B52, B79, B86, B97                                                                                                                                                   | [1,2]      |
| <b>RV-C Detected in Stool Samples</b>                                                                                                                                                   |            |
| C1, C5, C6, C12, C14, C15, C24, C25, C26, C36, C37, C39, C42, C43, C45                                                                                                                  | [1,2]      |
| <b>RV-C Detected in Blood Samples</b>                                                                                                                                                   |            |
| C8, C11                                                                                                                                                                                 | [4,5]      |
| <b>RV-C Isolated in Culture from Blood Sample</b>                                                                                                                                       |            |
| C8                                                                                                                                                                                      | [4]        |
| <b>RV-C Associated to Disseminated or Neurological Disease</b>                                                                                                                          |            |
| C8, C11                                                                                                                                                                                 | [4,5]      |
| <b>EV-C detected in stool samples</b>                                                                                                                                                   |            |
| C105, CVA21                                                                                                                                                                             | [6,7]      |
| <b>EV-C Associated to Disseminated or Neurological Disease</b>                                                                                                                          |            |
| C105, CVA21                                                                                                                                                                             | [6,7]      |
| <b>EV-D Detected in Stool Samples</b>                                                                                                                                                   |            |
| D68                                                                                                                                                                                     | [8]        |
| <b>EV-D Detected in Blood Samples</b>                                                                                                                                                   |            |
| D68                                                                                                                                                                                     | [8]        |
| <b>EV-D Associated to Disseminated or Neurological Disease</b>                                                                                                                          |            |
| D68                                                                                                                                                                                     | [8]        |

## References

1. Harvala, H.; McIntyre, C.L.; McLeish, N.J.; Kondracka, J.; Palmer, J.; Molyneaux, P.; Gunson, R.; Bennett, S.; Templeton, K.; Simmonds, P. High detection frequency and viral loads of human rhinovirus species a to C in fecal samples; diagnostic and clinical implications. *J. Med. Virol.* **2012**, *84*, 536–542.
2. Honkanen, H.; Oikarinen, S.; Peltonen, P.; Simell, O.; Ilonen, J.; Veijola, R.; Knip, M.; Hyoty, H. Human rhinoviruses including group c are common in stool samples of young finnish children. *J. Clin. Virol.* **2013**, *56*, 250–254.
3. Urquhart, G.E.; Stott, E.J. Rhinoviraemia. *Br. Med. J.* **1970**, *4*, 28–30.
4. Lupo, J.; Schuffenecker, I.; Morel-Baccard, C.; Bardet, J.; Payen, V.; Kaiser, L.; Constant, S.; Lobrinus, J.A.; Lin-Marq, N.; Lina, B.; *et al.* Disseminated rhinovirus C8 infection with infectious virus in blood and fatal outcome in a child with repeated episodes of bronchiolitis. *J. Clin. Microbiol.* **2015**, *53*, 1775–1777.
5. Tapparel, C.; L'Huillier, A.G.; Rougemont, A.L.; Beghetti, M.; Barazzone-Argiroffo, C.; Kaiser, L. Pneumonia and pericarditis in a child with hrv-c infection: A case report. *J. Clin. Virol.* **2009**, *45*, 157–160.
6. Lukashev, A.N.; Drexler, J.F.; Kotova, V.O.; Amjaga, E.N.; Reznik, V.I.; Gmyl, A.P.; Grard, G.; Taty Taty, R.; Trotsenko, O.E.; Leroy, E.M.; *et al.* Novel serotypes 105 and 116 are members of distinct subgroups of human enterovirus C. *J. Gen. Virol.* **2012**, *93*, 2357–2362.
7. Wang, S.; Xu, M.; Lin, X.; Liu, Y.; Xiong, P.; Wang, L.; Xu, A.; Tao, Z.; Zhang, D. Molecular characterization of coxsackievirus A21 in shandong, China. *Arch. Virol.* **2015**, doi:10.1007/s00705-015-2669-7.
8. Greninger, A.L.; Naccache, S.N.; Messacar, K.; Clayton, A.; Yu, G.; Somasekar, S.; Federman, S.; Stryke, D.; Anderson, C.; Yagi, S.; *et al.* A novel outbreak enterovirus d68 strain associated with acute flaccid myelitis cases in the USA (2012-14): A retrospective cohort study. *Lancet Infect. Dis.* **2015**, *15*, 671–682.

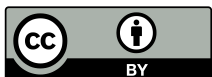

© 2016 by the authors; licensee MDPI, Basel, Switzerland. This article is an open access article distributed under the terms and conditions of the Creative Commons by Attribution (CC-BY) license (<http://creativecommons.org/licenses/by/4.0/>).
